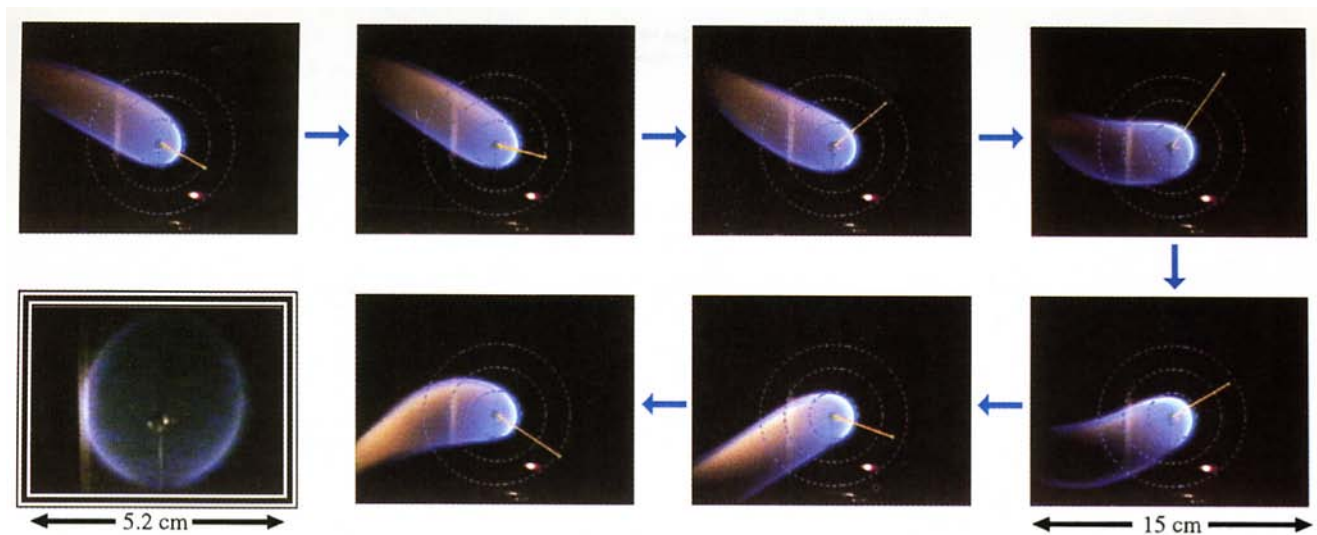

### The Visualization of G-jitter Effects on a Burning Fuel Droplet in Reduced Gravity

P.M. Struk, J.S. T'ien, Case Western Reserve University  
D.L. Dietrich, NASA Lewis Research Center

These flame images are from an experiment aboard NASA's reduced gravity research aircraft. The experiment studied the combustion of fuel droplets in reduced gravity. A constant size fuel droplet was simulated using a wetted porous sphere continuously supplied with fuel (n-decane). Instantaneous measurements of the acceleration were superimposed on the series of images showing the effect and time response of the flame. The variation of the gravity level (both magnitude and direction), or **g-jitter**, was due to aircraft acceleration-deceleration,

vibrations, and atmospheric turbulence. The orange line is the acceleration vector originating at the center of the fuel droplet. Each graphically overlaid circle represents an acceleration magnitude of  $10^{-2}$  normal (Earth's) gravity. Each frame is shown at 0.4 second intervals. This test was at .05 MPa pressure and a 15% oxygen 85% nitrogen ambient with a 5 mm diameter porous sphere. The last image shows a flame in  $10^{-4}$  normal gravity. Here, at the lower gravity level and in the absence of **g-jitter**, the flame attained a near spherical shape.

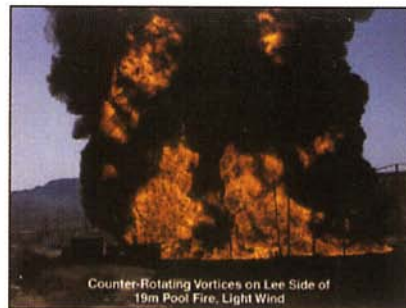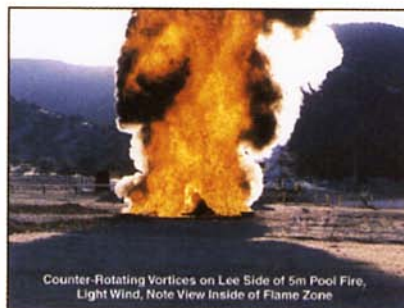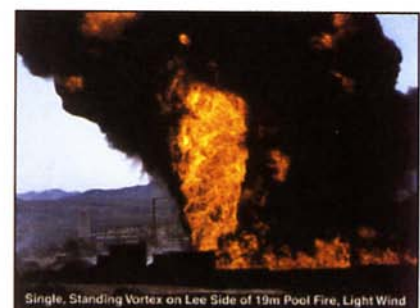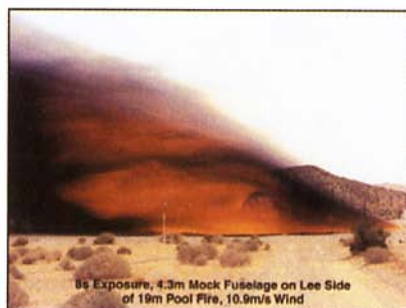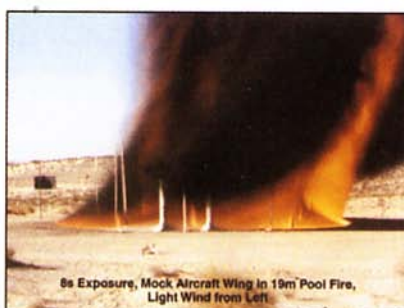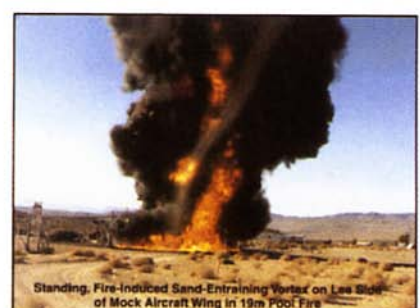

### Flame Structure of Large, Hydrocarbon-Fueled Pool Fires

Louis A. Gritzo and Sheldon R. Tieszen, Sandia National Laboratories, Albuquerque, NM  
Douglas Murray, Naval Air Warfare Center - Weapons Division, China Lake, CA.

These flame structures were observed during experiments performed to characterize the hazard posed by large fires, and to yield data, through the application of new and innovative diagnostics, required for the validation and further development of computational models which strive to predict this hazard.

These experiments were sponsored by the Defense Special Weapons Agency, and the Sandia Engineering Sciences Research Foundation. Work was performed in part at Sandia National Laboratories under United States Department of Energy contract DE AC04-94 AL8500.
